# Supplementary material
Source: publisher site journal article supplement (https://www.dovepress.com/article/318956)
Supplement: Supplementary file 1 [file get_supplementary_file.php]

| Supplementary Table 1. Associations between blood pressure components and the incidences of adverse birth outcome in normotensive pregnant women (N=28,370) | | | | | | | | |
| --- | --- | --- | --- | --- | --- | --- | --- | --- |
| Adverse birth outcome | Trajectory  groups | Low-stable pattern | Moderate-increasing pattern | *P* value | Moderate-decreasing pattern | *P* value | High-stable pattern | *P* value | |
| Systolic blood pressure | n (%) | 1180(11.89) | 869(14.25) |  | 718(12.44) |  | 968(14.72) |  | |
| Un-adjusted | reference | 1.024(1.013-1.035) | <0.001 | 1.005(0.994-1.017) | 0.332 | 1.029(1.018-1.040) | <0.001 | |
| Adjusted | reference | 1.024(1.013-1.035) | <0.001 | 1.002(0.991-1.013) | 0.669 | 1.024(1.013-1.035) | <0.001 | |
| Diastolic blood pressure | n (%) | 1112(12.37) | 881(13.16) |  | 677(12.31) |  | 1070(14.81) |  | |
| Un-adjusted | reference | 1.008(0.997-1.019) | 0.152 | 0.999(0.988-1.011) | 0.907 | 1.025(1.014-1.035) | <0.001 | |
| Adjusted | reference | 1.008(0.997-1.019) | 0.160 | 0.998(0.986-1.009) | 0.675 | 1.021(1.011-1.032) | <0.001 | |
| Mean arterial pressure | n (%) | 1223(11.97) | 872(13.95) |  | 716(12.63) |  | 924(14.81) |  | |
| Un-adjusted | reference | 1.020(1.009-1.031) | <0.001 | 1.007(0.996-1.018) | 0.244 | 1.029(1.018-1.040) | <0.001 | |
| Adjusted | reference | 1.020(1.009-1.031) | <0.001 | 1.004(0.993-1.015) | 0.494 | 1.023(1.012-1.034) | <0.001 | |
| Pulse pressure | n (%) | 973(11.96) | 893(13.80) |  | 708(12.77) |  | 1161(14.23) |  | |
| Un-adjusted | reference | 1.019(1.008-1.030) | <0.001 | 1.008(0.996-1.019) | 0.188 | 1.022(1.012-1.033) | <0.001 | |
| Adjusted | reference | 1.018(1.007-1.029) | 0.001 | 1.006(0.995-1.018) | 0.300 | 1.020(1.009-1.031) | <0.001 | |
| Adjusted for maternal age, pregnancy times, parity, culture degree, prepregnacy BMI and infant sex. | | | | | | | | |

| Supplementary Table 2. Associations between trajectory of SBP during pregnancy and the incidences of adverse birth outcomes (N=28,679) | | | | | | | | |
| --- | --- | --- | --- | --- | --- | --- | --- | --- |
| Outcomes | SBP trajectory  groups | Low-stable pattern | Moderate-increasing pattern | *P* value | Moderate-decreasing pattern | *P* value | High-stable pattern | *P* value | |
| Neonatal death | n (%) | 11(0.11) | 11(0.18) |  | 10(0.17) |  | 10(0.15) |  | |
| Un-adjusted | reference | 1.001(0.999-1.002) | 0.267 | 1.001(0.999-1.002) | 0.353 | 1.000(0.999-1.002) | 0.531 | |
| Adjusted | reference | 1.001(0.999-1.002) | 0.281 | 1.001(0.999-1.002) | 0.334 | 1.000(0.999-1.002) | 0.517 | |
| Preterm birth | n (%) | 292(2.94) | 239(3.91) |  | 213(3.60) |  | 262(3.90) |  | |
| Un-adjusted | reference | 1.010(1.004-1.016) | 0.001 | 1.007(1.001-1.013) a | 0.028 | 1.010(1.004-1.015) | 0.001 | |
| Adjusted | reference | 1.009(1.004-1.015) | 0.002 | 1.005(1.000-1.011) | 0.072 | 1.008(1.003-1.014) | 0.005 | |
| Low Apgar score | n (%) | 72(0.73) | 60(0.98) |  | 56(0.95) |  | 57(0.85) |  | |
| Un-adjusted | reference | 1.003(1.000-1.006) | 0.088 | 1.002(0.999-1.005) | 0.142 | 1.001(0.998-1.004) | 0.401 | |
| Adjusted | reference | 1.002(0.999-1.005) | 0.112 | 1.002(0.999-1.005) | 0.157 | 1.001(0.998-1.004) | 0.498 | |
| Low birth weight | n (%) | 140(1.41) | 180(2.94) |  | 105(1.78) |  | 149(2.22) |  | |
| Un-adjusted | reference | 1.017(1.012-1.022) | <0.001 | 1.004(0.999-1.009) | 0.117 | 1.009(1.004-1.014) | <0.001 | |
| Adjusted | reference | 1.017(1.012-1.022) | <0.001 | 1.003(0.999-1.008) | 0.165 | 1.009(1.004-1.013) | <0.001 | |
| High birth weight | n (%) | 787(7.93) | 536(8.76) |  | 452(7.65) |  | 638(9.49) |  | |
| Un-adjusted | reference | 1.010(1.001-1.019) | 0.033 | 0.997(0.988-1.007) | 0.584 | 1.017(1.008-1.026) | <0.001 | |
| Adjusted | reference | 1.010(1.001-1.019) | 0.028 | 0.995(0.986-1.004) | 0.295 | 1.013(1.004-1.022) | 0.005 | |
| Adjusted for maternal age, pregnancy times, parity, culture degree, prepregnacy BMI and infant sex. | | | | | | | | |

| Supplementary Table 3. Associations between trajectory of DBP during pregnancy and the incidences of adverse birth outcomes(N=28,679) | | | | | | | | |
| --- | --- | --- | --- | --- | --- | --- | --- | --- |
| Outcomes | DBP trajectory  groups | Low-stable pattern | Moderate-increasing pattern | *P* value | Moderate-decreasing pattern | *P* value | High-stable pattern | *P* value |
| Neonatal death | n (%) | 9(0.10) | 11(0.16) |  | 11(0.20) |  | 11(0.15) |  |
| Un-adjusted | reference | 1.001(0.999-1.002) | 0.294 | 1.001(1.000-1.002) | 0.142 | 1.000(0.999-1.002) | 0.414 |
| Adjusted | reference | 1.001(0.999-1.002) | 0.349 | 1.001(1.000-1.002) | 0.140 | 1.000(0.999-1.002) | 0.450 |
| Preterm birth | n (%) | 267(2.97) | 269(4.03) |  | 190(3.38) |  | 280(3.79) |  |
| Un-adjusted | reference | 1.011(1.005-1.017) | <0.001 | 1.004(0.998-1.010) | 0.189 | 1.008(1.003-1.014) | 0.004 |
| Adjusted | reference | 1.012(1.006-1.018) | <0.001 | 1.004(0.998-1.010) | 0.213 | 1.009(1.003-1.015) | 0.002 |
| Low Apgar score | n (%) | 72(0.80) | 59(0.88) |  | 37(0.66) |  | 77(1.04) |  |
| Un-adjusted | reference | 1.001(0.998-1.004) | 0.572 | 0.999(0.995-1.002) | 0.363 | 1.002(1.000-1.005) | 0.092 |
| Adjusted | reference | 1.001(0.998-1.004) | 0.699 | 0.999(0.996-1.002) | 0.359 | 1.002(0.999-1.005) | 0.122 |
| Low birth weight | n (%) | 129(1.43) | 175(2.62) |  | 91(1.62) |  | 179(2.42) |  |
| Un-adjusted | reference | 1.013(1.008-1.018) | <0.001 | 1.002(0.997-1.007) | 0.442 | 1.011(1.006-1.016) | <0.001 |
| Adjusted | reference | 1.014(1.009-1.019) | <0.001 | 1.002(0.997-1.007) | 0.456 | 1.012(1.007-1.017) | <0.001 |
| High birth weight | n (%) | 745(8.28) | 517(7.75) |  | 460(8.18) |  | 691(9.36) |  |
| Un-adjusted | reference | 0.996(0.987-1.005) | 0.333 | 0.999(0.990-1.009) | 0.858 | 1.012(1.003-1.021) | 0.007 |
| Adjusted | reference | 0.994(0.985-1.003) | 0.211 | 0.997(0.988-1.007) | 0.573 | 1.007(0.999-1.016) | 0.095 |
| Adjusted for maternal age, pregnancy times, parity, culture degree, prepregnacy BMI and infant sex. | | | | | | | | |

| Supplementary Table 4. Associations between trajectory of MAP during pregnancy and the incidences of adverse birth outcomes(N=28,679) | | | | | | | | |
| --- | --- | --- | --- | --- | --- | --- | --- | --- |
| Outcomes | MAP trajectory  groups | Low-stable pattern | Moderate-increasing pattern | *P* value | Moderate-decreasing pattern | *P* value | High-stable pattern | *P* value |
| Neonatal death | n (%) | 8(0.08) | 11(0.18) |  | 13(0.22) |  | 10(0.16) |  |
| Un-adjusted | reference | 1.001(1.000-1.002) | 0.112 | 1.001(1.000-1.003) | 0.021 | 1.001(1.000-1.002) | 0.202 |
| Adjusted | reference | 1.001(1.000-1.002) | 0.132 | 1.001(1.000-1.003) | 0.018 | 1.001(1.000-1.002) | 0.207 |
| Preterm birth | n (%) | 291(2.85) | 253(4.04) |  | 210(3.62) |  | 252(3.94) |  |
| Un-adjusted | reference | 1.012(1.006-1.018) | <0.001 | 1.008(1.002-1.014) | 0.011 | 1.011(1.005-1.017) | <0.001 |
| Adjusted | reference | 1.013(1.007-1.018) | <0.001 | 1.007(1.001-1.013) | 0.026 | 1.010(1.004-1.016) | 0.001 |
| Low Apgar score | n (%) | 78(0.76) | 57(0.91) |  | 50(0.86) |  | 60(0.94) |  |
| Un-adjusted | reference | 1.001(0.999-1.004) | 0.319 | 1.001(0.998-1.004) | 0.517 | 1.002(0.999-1.005) | 0.238 |
| Adjusted | reference | 1.001(0.998-1.004) | 0.429 | 1.001(0.998-1.004) | 0.533 | 1.001(0.999-1.004) | 0.324 |
| Low birth weight | n (%) | 143(1.40) | 167(2.67) |  | 96(1.65) |  | 168(2.62) |  |
| Un-adjusted | reference | 1.014(1.009-1.019) | <0.001 | 1.003(0.998-1.008) | 0.267 | 1.014(1.009-1.019) | <0.001 |
| Adjusted | reference | 1.014(1.009-1.019) | <0.001 | 1.002(0.998-1.007) | 0.331 | 1.014(1.009-1.019) | <0.001 |
| High birth weight | n (%) | 817(8.00) | 531(8.49) |  | 469(8.08) |  | 596(9.31) |  |
| Un-adjusted | reference | 1.006(0.997-1.015) | 0.183 | 1.001(0.992-1.010) | 0.820 | 1.015(1.006-1.024) | 0.001 |
| Adjusted | reference | 1.006(0.997-1.015) | 0.220 | 0.999(0.990-1.008) | 0.811 | 1.009(1.000-1.018) | 0.052 |
| Adjusted for maternal age, pregnancy times, parity, culture degree, prepregnacy BMI and infant sex. | | | | | | | | |

| Supplementary Table 5. Associations between trajectory of PP during pregnancy and the incidences of adverse birth outcomes(N=28,679) | | | | | | | | |
| --- | --- | --- | --- | --- | --- | --- | --- | --- |
| Outcomes | PP trajectory  groups | Low-stable pattern | Moderate-increasing pattern | *P* value | Moderate-decreasing pattern | *P* value | High-stable  pattern | *P* value |
| Neonatal death | n (%) | 9(0.11) | 14(0.21) |  | 12(0.21) |  | 7(0.08) |  |
| Un-adjusted | reference | 1.001(1.000-1.002) | 0.101 | 1.001(1.000-1.002) | 0.126 | 1.000(0.999-1.001) | 0.659 |
| Adjusted | reference | 1.001(1.000-1.002) | 0.091 | 1.001(1.000-1.002) | 0.116 | 1.000(0.999-1.001) | 0.723 |
| Preterm birth | n (%) | 262(3.21) | 220(3.37) |  | 207(3.65) |  | 316(3.80) |  |
| Un-adjusted | reference | 1.002(0.996-1.008) | 0.605 | 1.004(0.998-1.011) | 0.153 | 1.006(1.000-1.012) | 0.042 |
| Adjusted | reference | 1.000(0.994-1.006) | 0.909 | 1.003(0.997-1.010) | 0.275 | 1.004(0.998-1.010) | 0.175 |
| Low Apgar score | n (%) | 53(0.65) | 59(0.90) |  | 46(0.81) |  | 87(1.04) |  |
| Un-adjusted | reference | 1.003(1.000-1.006) | 0.097 | 1.002(0.998-1.005) | 0.311 | 1.004(1.001-1.007) | 0.006 |
| Adjusted | reference | 1.003(1.000-1.006) | 0.092 | 1.002(0.999-1.005) | 0.316 | 1.004(1.001-1.007) | 0.006 |
| Low birth weight | n (%) | 132(1.62) | 157(2.41) |  | 110(1.94) |  | 174(2.09) |  |
| Un-adjusted | reference | 1.009(1.004-1.014) | <0.001 | 1.003(0.998-1.009) | 0.163 | 1.005(1.001-1.010) | 0.022 |
| Adjusted | reference | 1.008(1.003-1.013) | 0.001 | 1.003(0.998-1.008) | 0.223 | 1.004(1.000-1.009) | 0.063 |
| High birth weight | n (%) | 633(7.76) | 584(8.95) |  | 439 (7.74) |  | 757(9.09) |  |
| Un-adjusted | reference | 1.013(1.004-1.022) | 0.007 | 1.000(0.990-1.010) | 0.990 | 1.014(1.005-1.023) | 0.002 |
| Adjusted | reference | 1.013(1.004-1.022) | 0.006 | 0.999(0.990-1.009) | 0.839 | 1.014(1.004-1.022) | 0.002 |
| Adjusted for maternal age, pregnancy times, parity, culture degree, prepregnacy BMI and infant sex. | | | | | | | | |

**Supplementary Figure 1****.** The ROC curves for the prediction performance of ABO for different blood pressure components.
